# Supplementary material
Source: ML conference proceedings conference paper supplement (https://proceedings.neurips.cc/paper_files/paper/2011/hash/ff49cc40a8890e6a60f40ff3026d2730-Abstract.html)
Supplement: Supplementary file 1 [file ff49cc40a8890e6a60f40ff3026d2730-Supplemental.zip]

---

# Supplementary material for ‘Gaussian process modulated renewal processes’

---

**Vinayak Rao**  
Gatsby Computational Neuroscience Unit  
University College London  
vr Rao@gatsby.ucl.ac.uk

**Yee Whye Teh**  
Gatsby Computational Neuroscience Unit  
University College London  
ywtteh@gatsby.ucl.ac.uk

We first prove equation (4) of the main text for a general nonstationary hazard function  $h(\tau, t)$ .

**Proposition S.1** For a renewal process with nonstationary hazard function  $h(\tau, t)$ , the waiting time  $\tau$  given that the last event occurred at time  $t_{prev}$  is given by

$$g(\tau|t_{prev}) = h(\tau, t_{prev} + \tau) \exp\left(-\int_0^\tau h(u, t_{prev} + u) du\right) \quad (1)$$

*Proof.* By definition (see equation (2) in the main text),

$$h(\tau, t_{prev} + \tau) = \frac{g(\tau|t_{prev})}{1 - \int_0^\tau g(u|t_{prev}) du} \quad (2)$$

Let  $y = 1 - \int_0^\tau g(u|t_{prev}) du$ . It follows that

$$h(\tau, t_{prev} + \tau) = \frac{-dy/d\tau}{y}, \text{ so that} \quad (3)$$

$$y = \exp\left(-\int_0^\tau h(u, t_{prev} + u) du\right) \quad (4)$$

Substituting back for  $y$  and differentiating w.r.t.  $\tau$ , we get equation (1). □

We now prove proposition 2 from the main text.

**Proposition 2** For any  $\Omega \geq \max_{t, \tau} h(\tau)\lambda(t)$ ,  $F$  is a sample from a modulated renewal process with hazard  $h(\cdot)$  and modulating intensity  $\lambda(\cdot)$ .

*Proof.* We need to show that  $F_i - F_{i-1} \sim g$ .

Denote by  $E_i^*$  the restriction of  $E$  to the interval  $(F_{i-1}, F_i)$ , not including boundaries. Note that

$$P(F_i, E_i^* | F_{i-1}) = \left( \prod_{e \in E_i^*} 1 - \frac{\lambda(e)h(e - F_{i-1})}{\Omega} \right) \frac{\lambda(F_i)h(F_i - F_{i-1})}{\Omega} \quad (5)$$

Defining  $n = |E_i^*|$  and  $t_0 = F_{i-1}$ , we have

$$\begin{aligned}
P(F_i, n | F_{i-1}) &= \frac{\lambda(F_i)h(F_i - F_{i-1})}{\Omega} \\
&\int_{F_{i-1}}^{F_i} \int_{t_1}^{F_i} \dots \int_{t_{n-1}}^{F_i} dt_1 dt_2 \dots dt_n \left( \prod_{j=1}^n \Omega \exp -\Omega(t_j - t_{j-1}) \right) \left( \prod_{j=1}^n 1 - \frac{\lambda(t_j)h(t_j - F_{i-1})}{\Omega} \right) (\Omega \exp -(\Omega(F_i - t_n))) \\
&= \lambda(F_i)h(F_i - F_{i-1}) \exp(-\Omega(F_i - F_{i-1})) \int_{F_{i-1}}^{F_i} \int_{t_1}^{F_i} \dots \int_{t_n}^{F_i} dt_1 dt_2 \dots dt_n \left( \prod_{j=1}^n (\Omega - \lambda(t_j)h(t_j - F_{i-1})) \right) \tag{6}
\end{aligned}$$

$$= \lambda(F_i)h(F_i - F_{i-1}) \exp(-\Omega(F_i - F_{i-1})) \frac{1}{n!} \left( \int_{F_{i-1}}^{F_i} dt (\Omega - \lambda(t)h(t - F_{i-1})) \right)^n \tag{7}$$

Marginalizing out  $n$ , we then have

$$\begin{aligned}
P(F_i | F_{i-1}) &= \lambda(t)h(F_i - F_{i-1}) \exp(-\Omega(F_i - F_{i-1})) \left( \sum_{n=0}^{\infty} \frac{1}{n!} \left( \int_{F_{i-1}}^{F_i} dt (\Omega - \lambda(t)h(t - F_{i-1})) \right)^n \right) \\
&= \lambda(F_i)h(F_i - F_{i-1}) \exp \left( - \int_{F_{i-1}}^{F_i} \lambda(t)h(t - F_{i-1}) dt \right) \tag{8}
\end{aligned}$$

Comparing equation (4) of the main text, we have the desired result.

□
